# Supplementary material for: Assessing Interactions between Nitrogen Supply and Leaf Blast in Rice by Hyperspectral Imaging
Source: MDPI journal article supplement (doi:10.3390/rs16060939), 2024-03-07
Supplement: s1 [file s1]

**Supplementary material for**

# **Assessing Interactions between Nitrogen Supply and Leaf Blast in Rice by Hyperspectral Imaging**

Angeline Wanjiku Maina, Mathias Becker, and Erich-Christian Oerke

University of Bonn (Germany)

**in Remote Sensing, Special Issue ‘Spectral Imaging Technology for Crop Disease Detection‘**

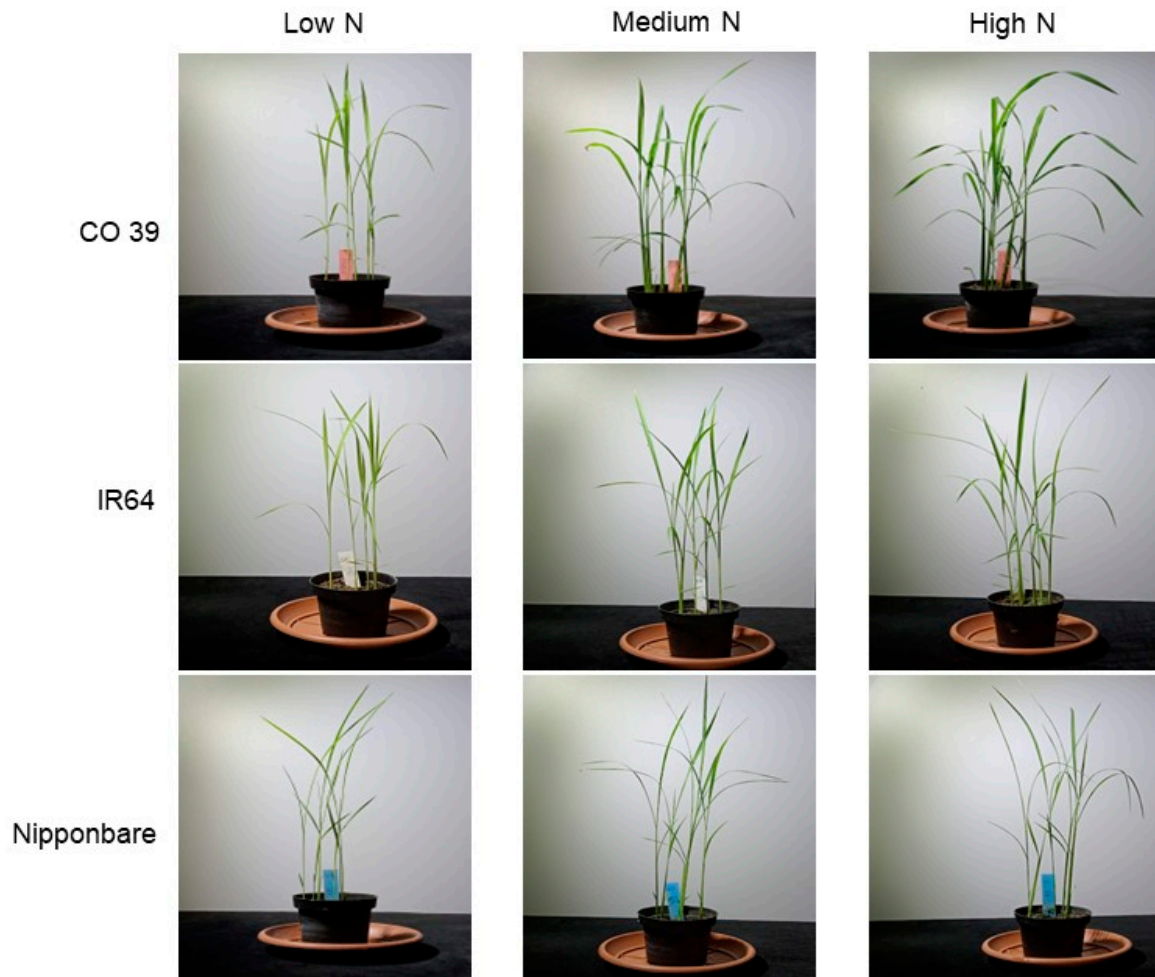

**Figure S1.** Characteristics of rice plants – genotypes CO 39, IR64, and Nipponbare - in response to increasing N levels 4 days after mineral N application. Different N inputs are indicated by low, medium, and high N levels.

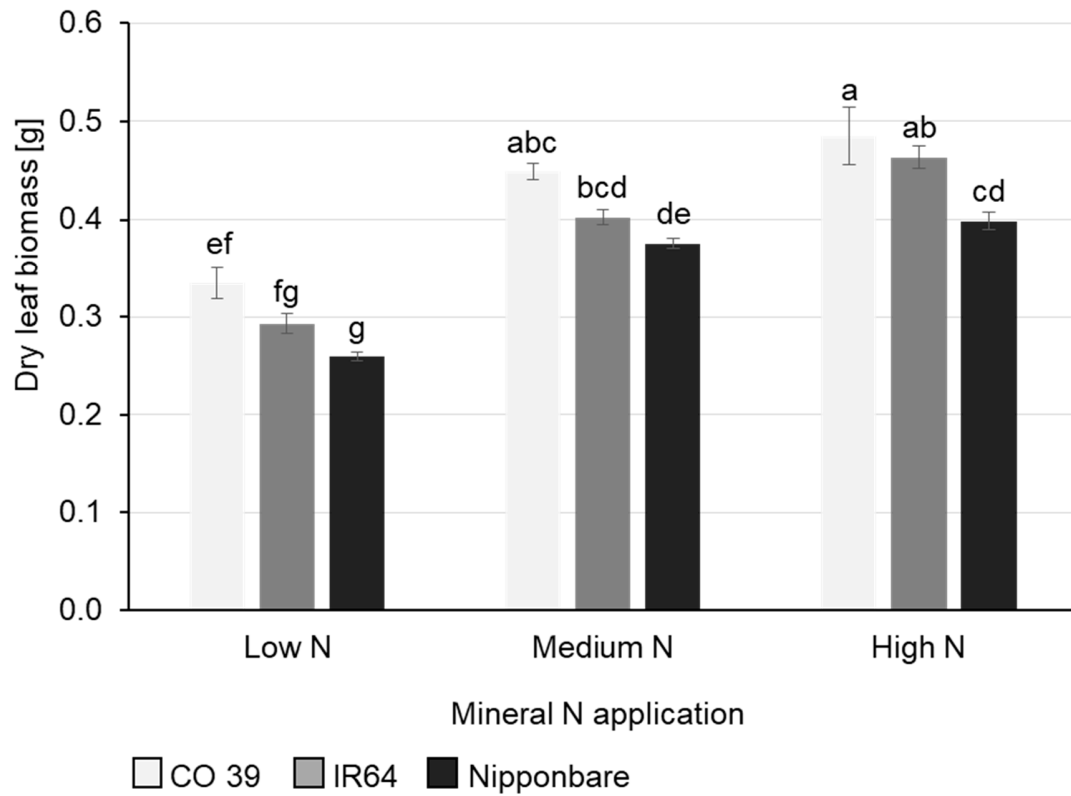

**Figure S2** Effect of mineral N supply on total dry biomass of rice genotypes CO 39, IR64, and Nipponbare 4 days N application. The mean  $\pm$  standard error ( $n = 4$ ) is shown. Letters denote statistically significant differences according to Tukey's HSD test ( $P = 0.05$ ).

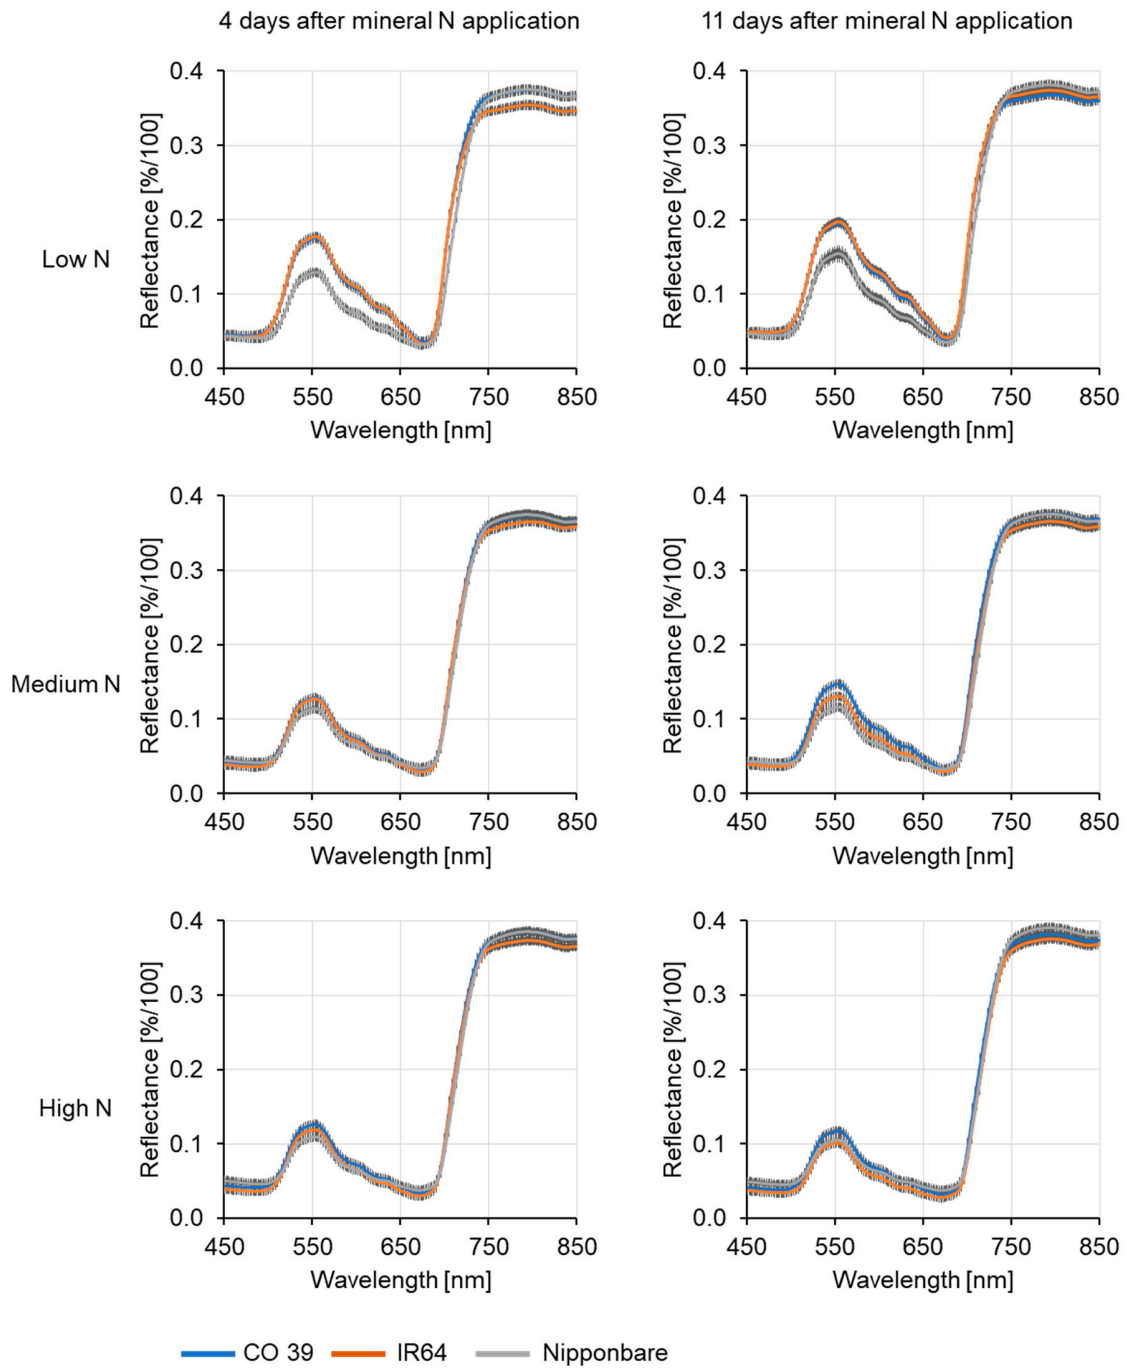

**Figure S3** Effect of genotype on the reflectance of healthy rice leaves. Average reflectance spectra of rice genotypes CO 39, IR64, and Nipponbare at low, medium, and high N supply at 4 and 11 days after mineral N application. For each waveband, bars represent the standard error of the mean (n = 4).

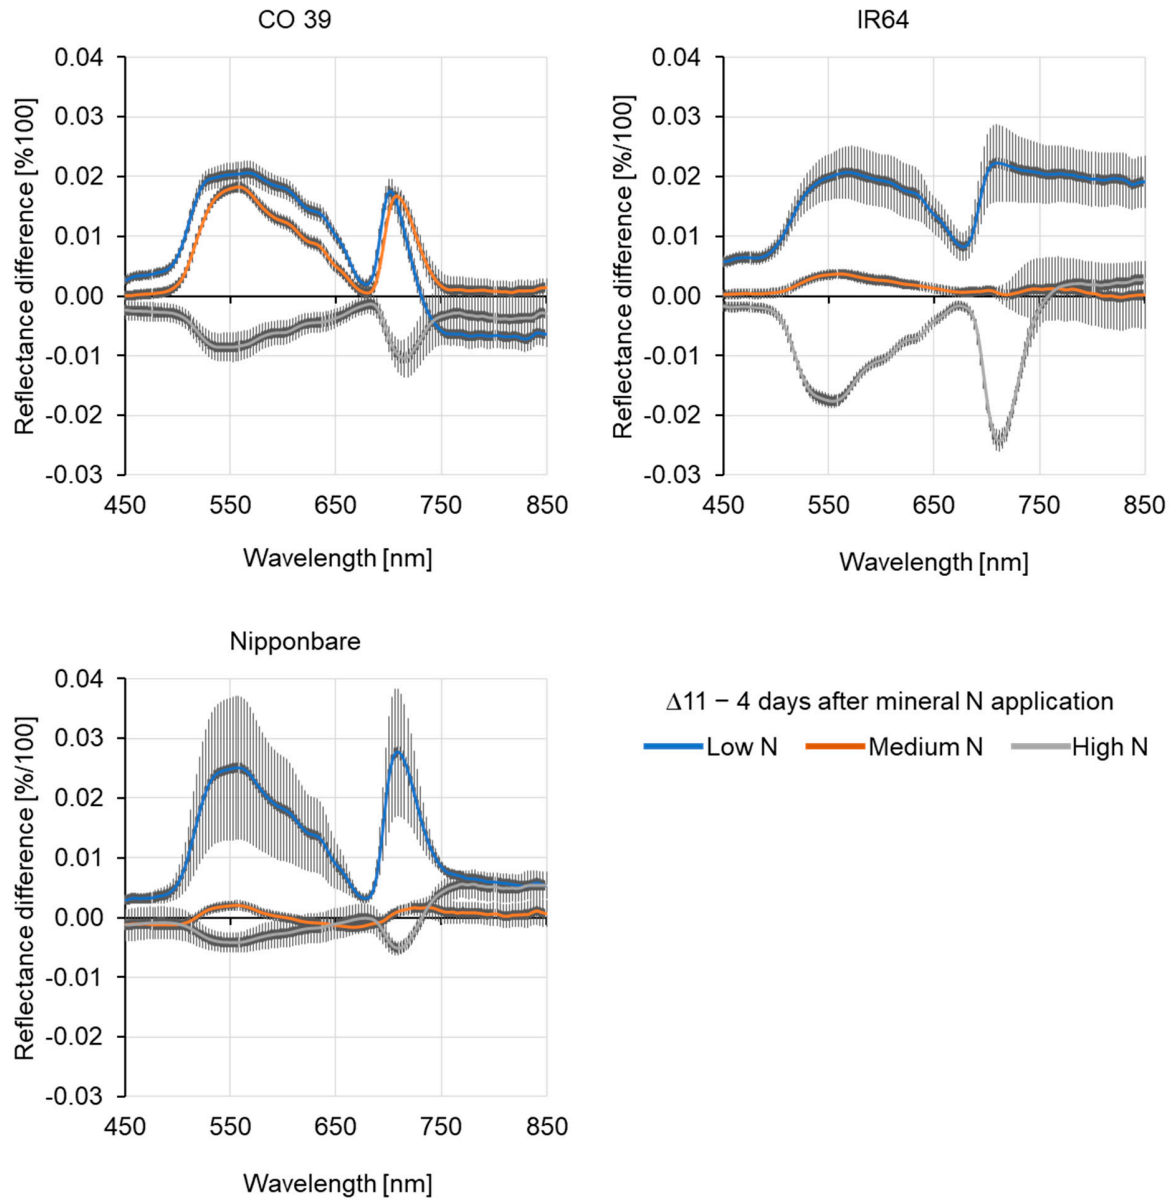

**Figure S4** Difference spectra of reflectance of healthy leaf tissue of rice genotypes CO 39, IR64, and Nipponbare grown at low, medium, and high mineral N supply, respectively. Differences were calculated by subtracting the spectra at 4 days after fertilizer application from 11 days after fertilizer application to determine the effect of time on mineral N application. For each waveband, bars represent the standard error of the mean ( $n = 4$ ).
