# Supplementary material for: Assessing Interactions between Nitrogen Supply and Leaf Blast in Rice by Hyperspectral Imaging
Source: MDPI journal article supplement (doi:10.3390/rs16060939), 2024-03-07
Supplement: s1 [file s1]

Archive with 1 entries (1 files):
- remotesensing-2889847-supplementary.pdf
